# Supplementary material
Source: PubMed Central journal article supplement (PMC4609006)
Supplement: supp_btu433_Cheng_et_al_Supplemental_Info_v13.pdf [file supp_btu433_Cheng_et_al_Supplemental_Info_v13.pdf]

## Content of Supplemental Information

|                                                                                                                                                            |    |
|------------------------------------------------------------------------------------------------------------------------------------------------------------|----|
| <b>Figure S1.</b> Distribution of beta values of DNA methylation array of the screening cohort (50 patients).....                                          | 2  |
| <b>Figure S2.</b> Pyrosequencing validation of methylated CpG sites of probes identified by array analyses.....                                            | 3  |
| <b>Figure S3.</b> Distribution of beta and pyrosequencing values of 8 validated In-CpG sites in two independent cohorts.....                               | 4  |
| <b>Figure S4.</b> Correlation between pyrosequencing validation values and mRNA expressions in validation cohort of ESCC patients.....                     | 5  |
| <b>Table S1.</b> Clinicopathological characteristics of the patients included in this study.....                                                           | 6  |
| <b>Table S2.</b> List of 186 genes with expression changes are related to ESCC metastasis and progression (curated from the literature).....               | 7  |
| <b>Table S3.</b> List of primers for pyrosequencing validation genes used in this study. ....                                                              | 12 |
| <b>Table S4.</b> List of primers used in RT-PCR .....                                                                                                      | 14 |
| <b>Table S5.</b> List of 44 top-ranked probes containing DNA methylated CpG sites.....                                                                     | 15 |
| <b>Table S6.</b> Univariate and multivariate analysis of 20 validated CpG sites with clinico-pathological prognostic factors in the validation cohort..... | 17 |
| <b>Table S7.</b> Array-based examination of methylated CpG sites.....                                                                                      | 18 |
| <b>Method S1.</b> Detailed procedures to calculate the 6 correlation metrics.....                                                                          | 19 |
| <b>References</b> .....                                                                                                                                    | 20 |

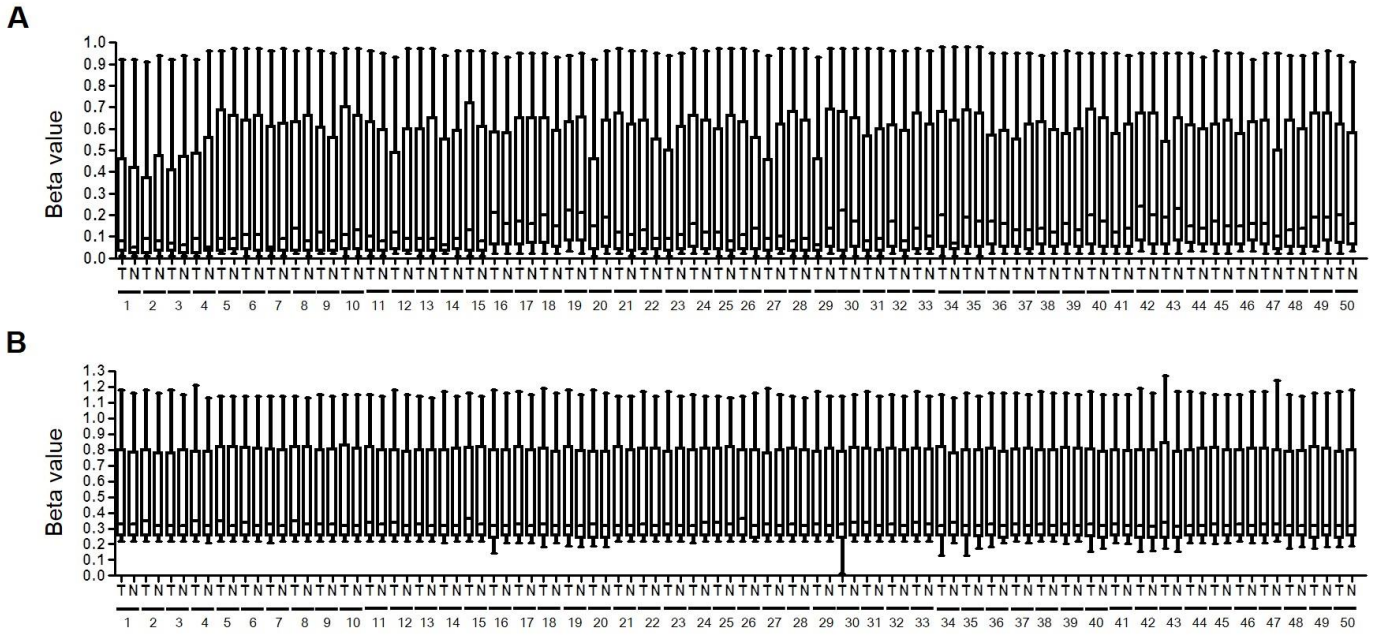

**Figure S1.** Distribution of beta values of DNA methylation array of the screening cohort (50 patients).  
 A) Un-normalized beta values. B) Normalized beta values using LOESS method. T: tumor tissue; N: normal tissue.

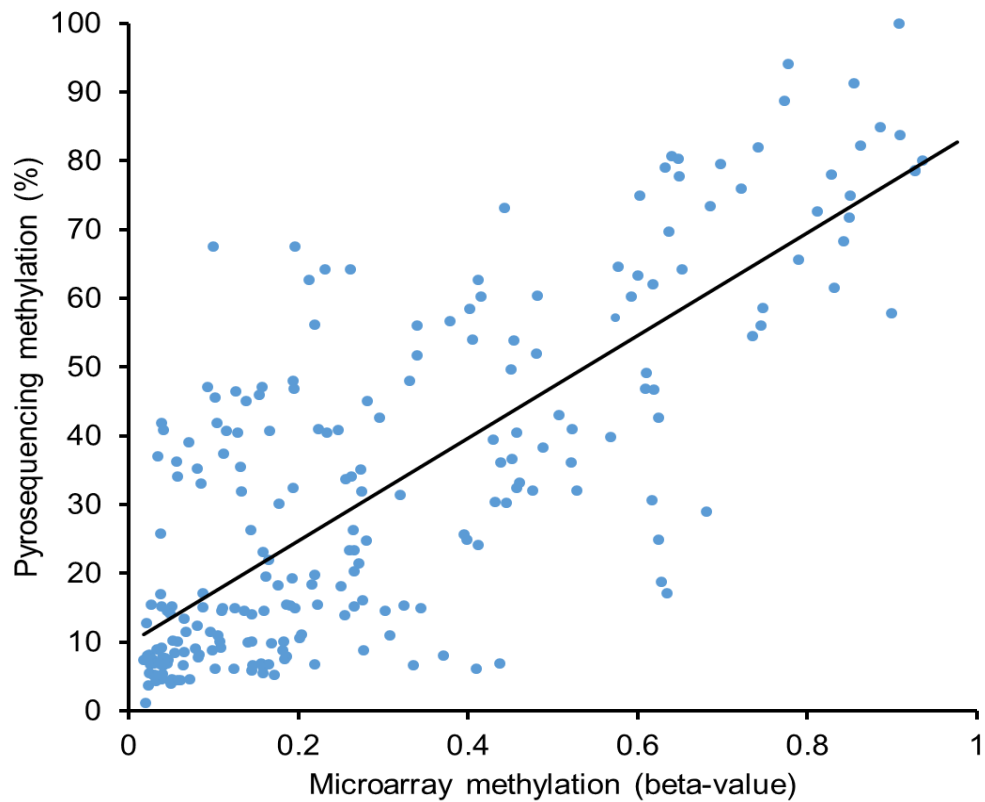

**Figure S2.** Pyrosequencing validation of methylated CpG sites of probes identified by array analyses. Scatterplot analysis showed a high concordance in methylation level between Illumina genome-wide methylation assay (X-axis: Beta value) and pyrosequencing validation (Y-axis). The data was collected on 20 CpG sites in 30 patients and was fitted by a linear regression line with a Pearson Correlation Coefficient 0.78.

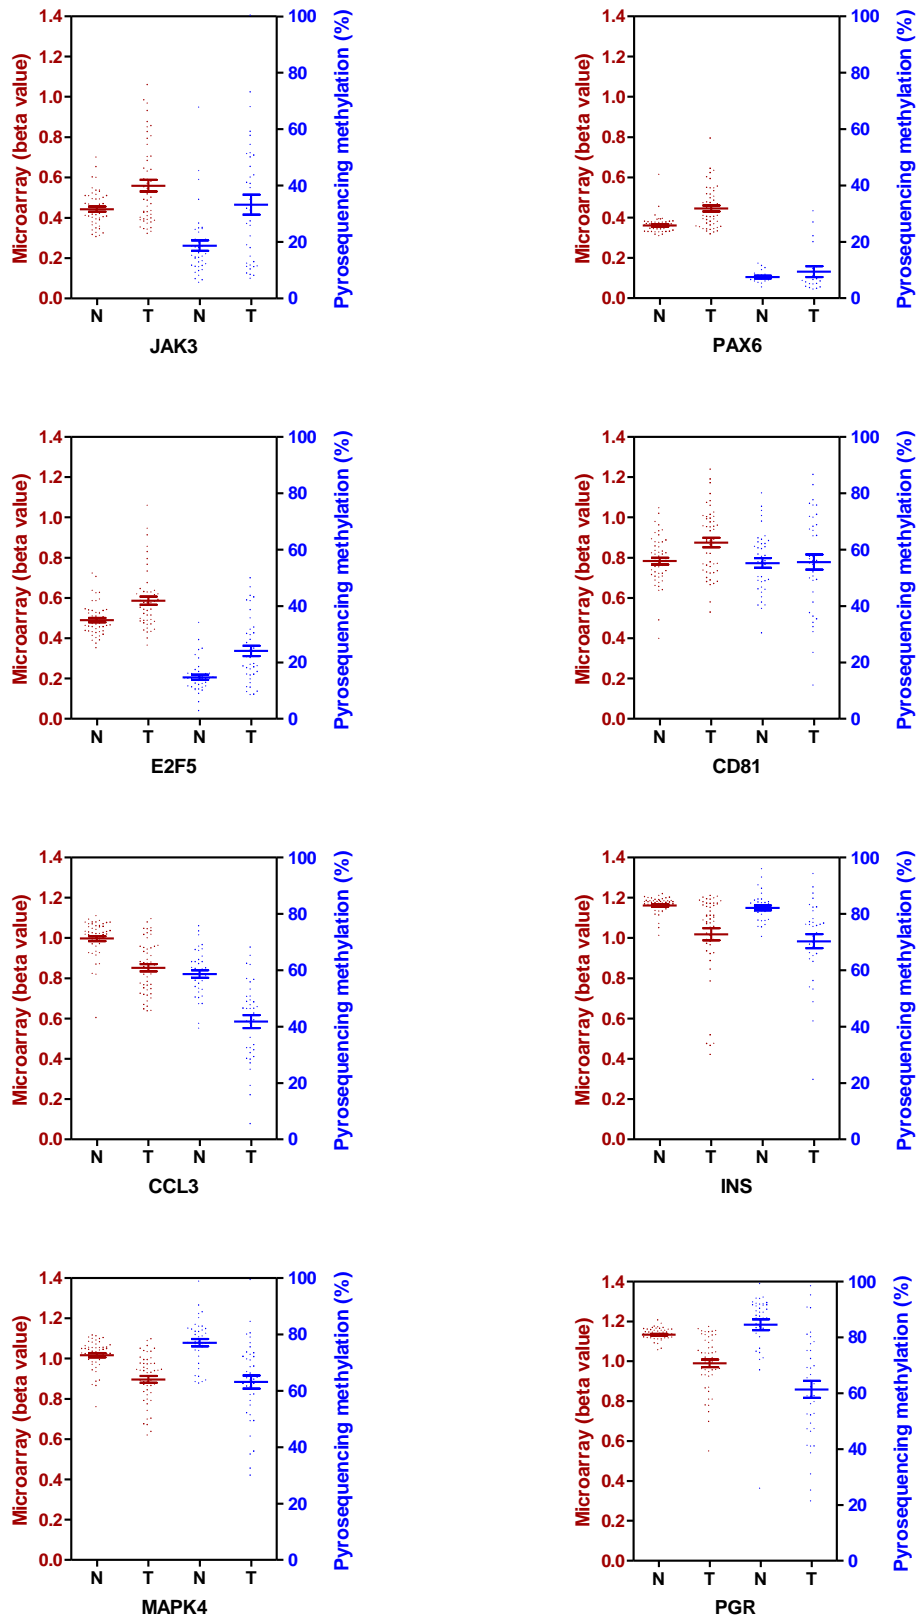

**Figure S3.** Distribution of beta and pyrosequencing values of 8 validated In-CpG sites in two independent cohorts.

The red color and blue color represent the array-derived beta values in screening cohort and the pyrosequencing methylation percentage in validation cohort respectively. N: normal tissue; T: tumor tissue. Error bars indicate standard error of the means.

**A**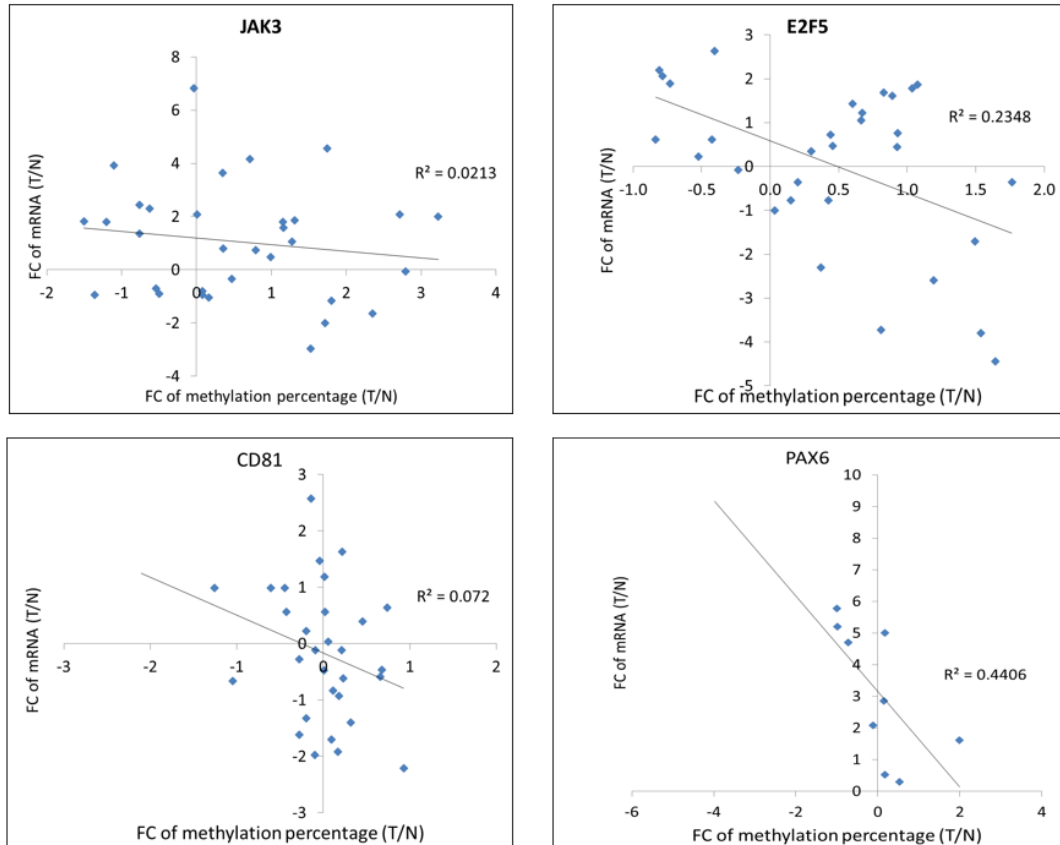**B**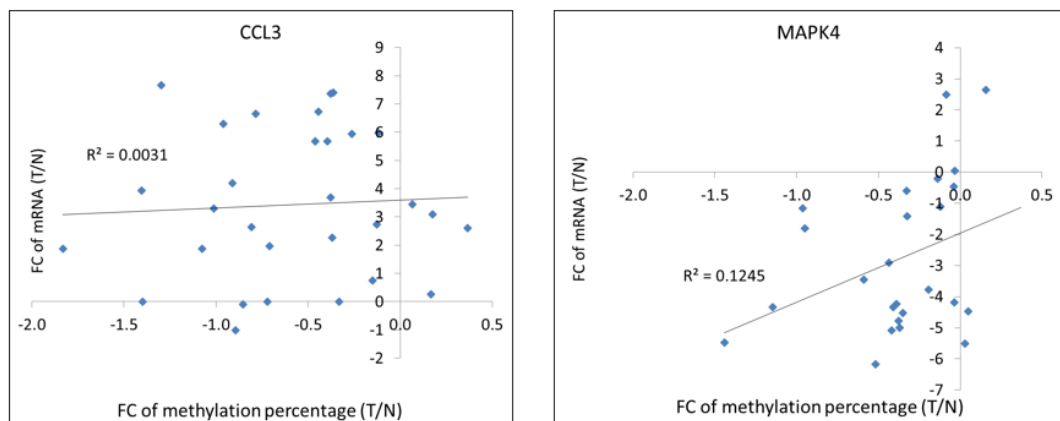

**Figure S4.** Correlation between pyrosequencing validation values and mRNA expressions in validation cohort of ESCC patients.

A) Increased methylation CpG sites of genes revealed from  $GRN_{esc}$ . B) Decreased methylation CpG sites of genes revealed from  $GRN_{esc}$ . FC: fold change; T/N: tumor/normal.

**Table S1.** Clinicopathological characteristics of the patients included in this study.

|                     |        | DNA methylation microarray analysis (N = 50) |    | Pyrosequencing validation (N = 50) |    |
|---------------------|--------|----------------------------------------------|----|------------------------------------|----|
|                     |        | N                                            | %  | N                                  | %  |
| Age                 | <60    | 31                                           | 62 | 32                                 | 64 |
|                     | >60    | 19                                           | 38 | 18                                 | 36 |
| Sex                 | Male   | 47                                           | 94 | 49                                 | 98 |
|                     | Female | 3                                            | 6  | 1                                  | 2  |
| UICC<br>tumor stage | I      | 4                                            | 8  | 3                                  | 6  |
|                     | II     | 15                                           | 30 | 13                                 | 26 |
|                     | III    | 20                                           | 40 | 21                                 | 42 |
|                     | IV     | 11                                           | 22 | 13                                 | 26 |
| T status            | T1     | 5                                            | 10 | 4                                  | 8  |
|                     | T2     | 6                                            | 12 | 2                                  | 4  |
|                     | T3     | 33                                           | 66 | 37                                 | 74 |
|                     | T4     | 6                                            | 12 | 7                                  | 14 |
| N status            | N0     | 19                                           | 38 | 22                                 | 44 |
|                     | N1     | 31                                           | 62 | 28                                 | 56 |
| M status            | M0     | 38                                           | 76 | 37                                 | 74 |
|                     | M1     | 12                                           | 24 | 13                                 | 26 |
| Recurrence          | Yes    | 28                                           | 85 | 17                                 | 85 |
|                     | No     | 5                                            | 15 | 3                                  | 15 |

N: number of patients; T status: tumor size; N status: lymph node metastasis; M status: distant organ metastasis.

**Table S2.** List of 186 genes with expression changes are related to ESCC metastasis and progression (curated from the literature).

| #  | Gene symbol | Gene ID | Expression change           |                                                                                                                                        |
|----|-------------|---------|-----------------------------|----------------------------------------------------------------------------------------------------------------------------------------|
|    |             |         | associated with progression | Reference                                                                                                                              |
| 1  | ACTN1       | 87      | Up                          | (Michaylira, et al., 2010)                                                                                                             |
| 2  | ALCAM       | 214     | Up                          | (Verma, et al., 2005)                                                                                                                  |
| 3  | AMIGO2      | 347902  | Up                          | (Michaylira, et al., 2010)                                                                                                             |
| 4  | ARHGDIG     | 398     | Up                          | (Li, et al., 2006)                                                                                                                     |
| 5  | ATR         | 545     | Down                        | (Li, et al., 2006)                                                                                                                     |
| 6  | AURKA       | 6790    | Up                          | (Michaylira, et al., 2010) (Shi, et al., 2010) (Wang, et al., 2009)                                                                    |
| 7  | BGN         | 633     | Up                          | (Wong, et al., 2009)                                                                                                                   |
| 8  | BID         | 637     | Up                          | (Michaylira, et al., 2010)                                                                                                             |
| 9  | BIRC5       | 332     | Up                          | (Michaylira, et al., 2010)                                                                                                             |
| 10 | BMP5        | 653     | Down                        | (Li, et al., 2006)                                                                                                                     |
| 11 | BNIP3       | 664     | Up                          | (Li, et al., 2006)                                                                                                                     |
| 12 | CARD10      | 29775   | Up                          | (Michaylira, et al., 2010)                                                                                                             |
| 13 | CASP3       | 836     | Down                        | (Li, et al., 2006)                                                                                                                     |
| 14 | CAV1        | 857     | Up                          | (Kato, et al., 2002)                                                                                                                   |
| 15 | CCNB1       | 891     | Up                          | (Song, et al., 2008)                                                                                                                   |
| 16 | CCND1       | 595     | Up                          | (Li, et al., 2006) (Nakajima, et al., 2002)                                                                                            |
| 17 | CCND2       | 894     | Down                        | (Li, et al., 2006)                                                                                                                     |
| 18 | CCR7        | 1236    | Up                          | (Ding, et al., 2003) (Ishida, et al., 2009)                                                                                            |
| 19 | CCT5        | 22948   | Up                          | (Uchikado, et al., 2006)                                                                                                               |
| 20 | CD44        | 960     | Up                          | (Wong, et al., 2009)                                                                                                                   |
| 21 | CD58        | 965     | Up                          | (Li, et al., 2006)                                                                                                                     |
| 22 | CD82        | 3732    | Down                        | (Li, et al., 2006) (Miyazaki, et al., 2000) (Uchida, et al., 1999)                                                                     |
| 23 | CD86        | 942     | Up                          | (Li, et al., 2006)                                                                                                                     |
| 24 | CD9         | 3732    | Down                        | (Uchida, et al., 1999)                                                                                                                 |
| 25 | CDC151      | 977     | Up                          | (Suzuki, et al., 2011)                                                                                                                 |
| 26 | CDC25B      | 994     | Down                        | (Li, et al., 2006)                                                                                                                     |
| 27 | CDH1        | 999     | Down                        | (Li, et al., 2006) (Kaihara, et al., 2001) (Chen, et al., 2011) (Zhang, et al., 2012) (Lioni, et al., 2007) (Matsushima, et al., 2011) |
| 28 | CDH2        | 1000    | Up                          | (Li, et al., 2010) (Li, et al., 2009) (Li, et al., 2009)                                                                               |
| 29 | CDK5        | 1020    | Down                        | (Li, et al., 2006)                                                                                                                     |
| 30 | CKS2        | 1164    | Up                          | (Michaylira, et al., 2010) (Uchikado, et al., 2006)                                                                                    |
| 31 | CLDN5       | 7122    | Up                          | (Chiba, et al., 2010)                                                                                                                  |
| 32 | CLDN7       | 1366    | Down                        | (Usami, et al., 2006) (Lioni, et al., 2007)                                                                                            |
| 33 | COL12A1     | 1303    | Up                          | (Michaylira, et al., 2010)                                                                                                             |

|    |         |        |      |                                                 |
|----|---------|--------|------|-------------------------------------------------|
| 34 | COL16A1 | 1307   | Up   | (Michaylira, et al., 2010)                      |
| 35 | COL1A1  | 1277   | Up   | (Wong, et al., 2009)                            |
| 36 | COL1A2  | 1278   | Up   | (Wong, et al., 2009)                            |
| 37 | COL27A1 | 85301  | Up   | (Michaylira, et al., 2010)                      |
| 38 | COL4A2  | 1284   | Up   | (Michaylira, et al., 2010)                      |
| 39 | COL5A1  | 1289   | Up   | (Michaylira, et al., 2010)                      |
| 40 | COL5A3  | 50509  | Up   | (Michaylira, et al., 2010)                      |
| 41 | COL8A1  | 1295   | Up   | (Michaylira, et al., 2010)                      |
| 42 | CSTA    | 1475   | Down | (Li, et al., 2005)                              |
| 43 | CTGF    | 1490   | Down | (Li, et al., 2006)                              |
| 44 | CTNNA1  | 1495   | Down | (Li, et al., 2006)                              |
| 45 | CTNNB1  | 1499   | Up   | (Hou, et al., 2011)                             |
| 46 | CTSB    | 1508   | Up   | (Jiao, et al., 2007)                            |
| 47 | CTTN    | 2017   | Up   | (Luo, et al., 2006) (Luo and Wang, 2007)        |
| 48 | CYR61   | 3491   | Up   | (Xie, et al., 2011)                             |
| 49 | DACT1   | 51339  | Up   | (Hou, et al., 2011)                             |
| 50 | DCBLD1  | 285761 | Up   | (Michaylira, et al., 2010)                      |
| 51 | DCBLD2  | 131566 | Up   | (Michaylira, et al., 2010)                      |
| 52 | DEC1    | 50514  | Down | (Wong, et al., 2011)                            |
| 53 | DFNA5   | 1687   | Up   | (Michaylira, et al., 2010)                      |
| 54 | DRD2    | 1813   | Up   | (Li, et al., 2006)                              |
| 55 | DSP     | 1832   | Down | (Li, et al., 2006)                              |
| 56 | EDN1    | 1906   | Up   | (Jiao, et al., 2007)                            |
| 57 | EGFR    | 1956   | Up   | (Li, et al., 2006)                              |
| 58 | ENG     | 2022   | Down | (Wong, et al., 2008)                            |
| 59 | EP300   | 2033   | Down | (Zhang, et al., 2007)                           |
| 60 | EPHA2   | 1969   | Up   | (Li, et al., 2006)                              |
| 61 | EPHB6   | 2051   | Down | (Li, et al., 2006)                              |
| 62 | ETS1    | 2113   | Up   | (Mukherjee, et al., 2003)                       |
| 63 | FERMT2  | 10979  | Up   | (Michaylira, et al., 2010)                      |
| 64 | FEZ1    | 9638   | Up   | (Michaylira, et al., 2010)                      |
| 65 | FHL1    | 2273   | Up   | (Michaylira, et al., 2010)                      |
| 66 | FHOD3   | 80206  | Up   | (Michaylira, et al., 2010)                      |
| 67 | FLNA    | 2316   | Up   | (Michaylira, et al., 2010)                      |
| 68 | FLRT2   | 23768  | Up   | (Michaylira, et al., 2010)                      |
| 69 | FN1     | 2335   | Up   | (Michaylira, et al., 2010) (Wong, et al., 2009) |
| 70 | FXYS5   | 53827  | Up   | (Michaylira, et al., 2010)                      |
| 71 | GJB2    | 2706   | Down | (Uchikado, et al., 2006)                        |
| 72 | GLI1    | 2735   | Up   | (Mori, et al., 2006)                            |



|     |          |       |      |                                                                          |
|-----|----------|-------|------|--------------------------------------------------------------------------|
| 73  | HGF      | 3082  | Up   | (Grugan, et al., 2010)                                                   |
| 74  | HIF1A    | 3091  | Up   | (Kurokawa, et al., 2003)                                                 |
| 75  | HLA-DRA  | 3122  | Up   | (Sadanaga, et al., 1994)                                                 |
| 76  | HLA-DRB1 | 3123  | Up   | (Sadanaga, et al., 1994)                                                 |
| 77  | HLA-DRB3 | 3125  | Up   | (Sadanaga, et al., 1994)                                                 |
| 78  | HLA-DRB4 | 3126  | Up   | (Sadanaga, et al., 1994)                                                 |
| 79  | HLA-DRB5 | 3127  | Up   | (Sadanaga, et al., 1994)                                                 |
| 80  | HNT      | 50863 | Up   | (Michaylira, et al., 2010)                                               |
| 81  | HSPA4    | 3308  | Down | (Li, et al., 2006)                                                       |
| 82  | HTRA1    | 5654  | Up   | (Michaylira, et al., 2010)                                               |
| 83  | ID1      | 3397  | Up   | (Yuen, et al., 2007)                                                     |
| 84  | ID2      | 3398  | Down | (Yuen, et al., 2007)                                                     |
| 85  | IGF1R    | 3480  | Up   | (Kong, et al., 2012)                                                     |
| 86  | IGFBP3   | 3486  | Up   | (Li, et al., 2006)                                                       |
| 87  | IGFBP6   | 3489  | Down | (Li, et al., 2006)                                                       |
| 88  | IGFBP7   | 3490  | Up   | (Michaylira, et al., 2010)                                               |
| 89  | IL8      | 3576  | Up   | (Ren, et al., 2005)                                                      |
| 90  | INHBA    | 3624  | Up   | (Michaylira, et al., 2010)                                               |
| 91  | ITGA3    | 3675  | Up   | (Michaylira, et al., 2010)                                               |
| 92  | ITGA5    | 3678  | Up   | (Michaylira, et al., 2010)                                               |
| 93  | ITGAM    | 3684  | Up   | (Li, et al., 2006)                                                       |
| 94  | ITGB5    | 3693  | Up   | (Li, et al., 2006)                                                       |
| 95  | IVL      | 3713  | Down | (Oda and Ono, 2004)                                                      |
| 96  | JUN      | 3725  | Up   | (Li, et al., 2006)                                                       |
| 97  | KISS1    | 3814  | Down | (Li, et al., 2009)                                                       |
| 98  | LAMB1    | 3912  | Up   | (Michaylira, et al., 2010)                                               |
| 99  | LAMB3    | 3914  | Up   | (Michaylira, et al., 2010)                                               |
| 100 | LAMC2    | 3918  | Up   | (Michaylira, et al., 2010) (Shen, et al., 2007) (Yamamoto, et al., 2001) |
| 101 | LGALS3   | 3958  | Down | (Shibata, et al., 2005)                                                  |
| 102 | LOX      | 4015  | Up   | (Sakai, et al., 2009)                                                    |
| 103 | LOXL2    | 4017  | Up   | (Michaylira, et al., 2010)                                               |
| 104 | LPXN     | 9404  | Up   | (Michaylira, et al., 2010)                                               |
| 105 | LTBP2    | 4053  | Up   | (Michaylira, et al., 2010)                                               |
| 106 | LYPD3    | 27076 | Up   | (Hansen, et al., 2008)                                                   |
| 107 | MAP1B    | 4131  | Up   | (Michaylira, et al., 2010)                                               |
| 108 | MAPK14   | 1432  | Down | (Li, et al., 2006)                                                       |
| 109 | MAPK4    | 5596  | Down | (Li, et al., 2006)                                                       |
| 110 | MAPK7    | 5598  | Down | (Li, et al., 2006)                                                       |

|     |             |        |      |                                                   |
|-----|-------------|--------|------|---------------------------------------------------|
| 111 | MCAM        | 4162   | Up   | (Michaylira, et al., 2010)                        |
| 112 | MDM2        | 4193   | Down | (Li, et al., 2006)                                |
| 113 | MIF         | 4282   | Up   | (Ren, et al., 2005)                               |
| 114 | MKI67       | 4288   | Up   | (Nakajima, et al., 2002) (Kawamura, et al., 1996) |
| 115 | MMP1        | 4312   | Up   | (Shen, et al., 2007) (Chen, et al., 2010)         |
| 116 | MMP13       | 4322   | Up   | (Li, et al., 2006) (Ye, et al., 2011)             |
| 117 | MMP2        | 4313   | Up   | (Li, et al., 2006) (Zhang, et al., 2012)          |
| 118 | MMP9        | 4318   | Up   | (Wong, et al., 2009)                              |
| 119 | MRC2        | 9902   | Up   | (Michaylira, et al., 2010)                        |
| 120 | MTA1        | 9112   | Up   | (Qian, et al., 2005)                              |
| 121 | MTSS1       | 9788   | Up   | (Xie, et al., 2011)                               |
| 122 | MUC1        | 4582   | Up   | (Ye, et al., 2011)                                |
| 123 | NDUFB9      | 4715   | Up   | (Uchikado, et al., 2006)                          |
| 124 | NEFL        | 4747   | Up   | (Michaylira, et al., 2010)                        |
| 125 | NME1        | 4830   | Down | (Tomita, et al., 2001)                            |
| 126 | PALM2-AKAP2 | 445815 | Up   | (Michaylira, et al., 2010)                        |
| 127 | PCDH7       | 5099   | Up   | (Michaylira, et al., 2010)                        |
| 128 | PDCD10      | 11235  | Down | (Li, et al., 2006)                                |
| 129 | PDGFRA      | 5156   | Up   | (Michaylira, et al., 2010)                        |
| 130 | PDPN        | 10630  | Up   | (Michaylira, et al., 2010) (Chuang, et al., 2009) |
| 131 | PIK3CA      | 5290   | Up   | (Akagi, et al., 2009)                             |
| 132 | PLEK2       | 26499  | Up   | (Michaylira, et al., 2010)                        |
| 133 | PLOD1       | 5351   | Up   | (Michaylira, et al., 2010)                        |
| 134 | POR         | 5447   | Up   | (Li, et al., 2006)                                |
| 135 | POSTN       | 10631  | Up   | (Michaylira, et al., 2010)                        |
| 136 | PPM1D       | 8493   | Down | (Li, et al., 2006)                                |
| 137 | PPP1R1B     | 84152  | Down | (Li, et al., 2006)                                |
| 138 | PRKCI       | 5584   | Up   | (Liu, et al., 2011) (Yang, et al., 2008)          |
| 139 | PTHLH       | 5744   | Up   | (Michaylira, et al., 2010)                        |
| 140 | PTK2        | 5747   | Up   | (Miyazaki, et al., 2003)                          |
| 141 | PTP4A3      | 11156  | Up   | (Ooki, et al., 2010)                              |
| 142 | PTPN2       | 5771   | Down | (Li, et al., 2006)                                |
| 143 | PTPRF       | 5792   | Down | (Li, et al., 2006)                                |
| 144 | PTTG1       | 9232   | Up   | (Ito, et al., 2008) (Yan, et al., 2009)           |
| 145 | PXN         | 5829   | Up   | (Wong, et al., 2009)                              |
| 146 | RAC3        | 5881   | Up   | (Li, et al., 2006)                                |
| 147 | RXRA        | 6256   | Down | (Li, et al., 2006)                                |
| 148 | S100A4      | 6275   | Up   | (Zhang, et al., 2012) (Zhang, et al., 2010)       |
| 149 | SDK2        | 54549  | Up   | (Michaylira, et al., 2010)                        |

|     |           |        |      |                                                                          |
|-----|-----------|--------|------|--------------------------------------------------------------------------|
| 150 | SEMA4D    | 10507  | Up   | (Li, et al., 2006)                                                       |
| 151 | SERPINB3  | 6317   | Up   | (Nagatani, et al., 2003)                                                 |
| 152 | SGCB      | 6443   | Up   | (Michaylira, et al., 2010)                                               |
| 153 | SKP2      | 6502   | Down | (Liu, et al., 2011) (Wang, et al., 2009)                                 |
| 154 | SLIT2     | 9353   | Down | (Kim, et al., 2008)                                                      |
| 155 | SNAI2     | 6591   | Up   | (Michaylira, et al., 2010) (Tang, et al., 2011)                          |
| 156 | SNCA      | 6622   | Up   | (Michaylira, et al., 2010)                                               |
| 157 | SPARC     | 6678   | Up   | (Michaylira, et al., 2010) (Wong, et al., 2009)                          |
| 158 | SPHK1     | 8877   | Up   | (Michaylira, et al., 2010)                                               |
| 159 | SPON2     | 10417  | Up   | (Michaylira, et al., 2010)                                               |
| 160 | SPP1      | 6696   | Up   | (Uchikado, et al., 2006)                                                 |
| 161 | SRC       | 6714   | Up   | (Chen, et al., 2010)                                                     |
| 162 | SRPX      | 8406   | Up   | (Michaylira, et al., 2010)                                               |
| 163 | STAT5B    | 6777   | Down | (Li, et al., 2006)                                                       |
| 164 | STC2      | 8614   | Up   | (Kita, et al., 2011)                                                     |
| 165 | STMN1     | 3925   | Up   | (Uchikado, et al., 2006)                                                 |
| 166 | STOML2    | 30968  | Up   | (Cao, et al., 2010)                                                      |
| 167 | SYNPO     | 11346  | Up   | (Michaylira, et al., 2010)                                               |
| 168 | TGFB1     | 7040   | Up   | (Wong, et al., 2009)                                                     |
| 169 | TGFB1I1   | 7041   | Up   | (Michaylira, et al., 2010)                                               |
| 170 | TGM2      | 7052   | Up   | (Michaylira, et al., 2010)                                               |
| 171 | THBD      | 7056   | Down | (Matsushita, et al., 1998) (Tezuka, et al., 1995)                        |
| 172 | THBS1     | 7057   | Up   | (Michaylira, et al., 2010) (Zhou, et al., 2009)                          |
| 173 | THY1      | 7070   | Up   | (Michaylira, et al., 2010)                                               |
| 174 | TIMP2     | 7077   | Down | (Chen, et al., 2010)                                                     |
| 175 | TNC       | 3371   | Up   | (Michaylira, et al., 2010)                                               |
| 176 | TNFRSF12A | 51330  | Up   | (Michaylira, et al., 2010)                                               |
| 177 | TNFRSF6B  | 8771   | Up   | (Xiong, et al., 2011)                                                    |
| 178 | TNS1      | 7145   | Up   | (Michaylira, et al., 2010)                                               |
| 179 | TP53      | 7157   | Up   | (Nakajima, et al., 2002) (Han, et al., 2007)                             |
| 180 | TWIST1    | 7291   | Up   | (Yuen, et al., 2007) (Xie, et al., 2009)                                 |
| 181 | TWIST2    | 117581 | Up   | (Michaylira, et al., 2010)                                               |
| 182 | VEGFA     | 7422   | Up   | (Mukherjee, et al., 2003) (Ren, et al., 2005)                            |
| 183 | VEGFC     | 7424   | Up   | (Li, et al., 2006) (Han, et al., 2007) (Krzystek-Korpacka, et al., 2007) |
| 184 | VIM       | 7431   | Up   | (Chen, et al., 2010) (Jin, et al., 2010)                                 |
| 185 | VWF       | 7450   | Up   | (Wong, et al., 2009)                                                     |
| 186 | ZEB2      | 9839   | Up   | (Matsushima, et al., 2011)                                               |

#: serial number; Up: expressed genes in ESCC progression; Down: repressed genes in ESCC progression.

**Table S3.** List of primers for pyrosequencing validation genes used in this study.

| Gene symbol | Primer type          | Sequence (from 5'-end to 3'-end)                 | Product size (bp) |
|-------------|----------------------|--------------------------------------------------|-------------------|
| ADCYAP1     | Forward              | TGGTTTTTGAGGTTTTTGTAGATAT                        | 315               |
|             | Biotinylated reverse | GGGACACCGCTGATCGTTTACCCTACCCTTCTACTTACTATAAT     |                   |
|             | Sequencing           | GTTTTTAGGGTGGTGATTTTAG                           |                   |
| KCNK4       | Forward              | AATGGGTTTGGGAGATGTTAGATTAG                       | 139               |
|             | Biotinylated reverse | GGGACACCGCTGATCGTTTAAAAAATTACAACAAAACCAACCTTCTA  |                   |
|             | Sequencing           | TAGAGTGGTGTGTTGTT                                |                   |
| SLC5A8      | Forward              | GGGGATATTTGAGTAGATGAGAATTG                       | 153               |
|             | Biotinylated reverse | GGGACACCGCTGATCGTTTAAACCCTTTATCCCACATTCC         |                   |
|             | Sequencing           | GGTAGGTTTTGTTAAGTG                               |                   |
| CD81        | Forward              | TTTTAAGGGGTGGTAGTAG                              | 154               |
|             | Biotinylated reverse | GGGACACCGCTGATCGTTTACCAAATACTCACCTCCTTT          |                   |
|             | Sequencing           | GGGGTGGTAGTAGGG                                  |                   |
| CFTR        | Biotin-Forward       | GGGACACCGCTGATCGTTTAGGGTGAGTAGTGGGTGGAGAAA       | 111               |
|             | Reverse              | ACCCCTTCCTTTACTCTTT                              |                   |
|             | Sequencing           | CCTAATCCCACCCCAAATTT                             |                   |
| E2F5        | Biotin-Forward       | GGGACACCGCTGATCGTTAAGGGAGGAAGAAAAAAGGAGATA       | 226               |
|             | Reverse              | ACTCTACACTTAATCCAAATCAT                          |                   |
|             | Sequencing           | AACAATCAACCAACTTC                                |                   |
| HS3ST2      | Forward              | GTGGTGGGGGTGTTTAGT                               | 107               |
|             | Biotinylated reverse | GGGACACCGCTGATCGTTTACCTCCCCATACAAACCACT          |                   |
|             | Sequencing           | AAGTTGGTTTGGGGT                                  |                   |
| JAK3        | Forward              | TTAGGAAATTAAGGGGTTTATATAGGAAGG                   | 210               |
|             | Biotinylated reverse | GGGACACCGCTGATCGTTTAACTAACCTTTACCCTAACCAACAC     |                   |
|             | Sequencing           | GGTTTTGTAGTTAGGTAAGA                             |                   |
| PENK        | Forward              | GGGGTAGAGTAATAGTAGTTAAGTG                        | 184               |
|             | Biotinylated reverse | GGGACACCGCTGATCGTTTAAACCCAAAAAACAATTCCT          |                   |
|             | Sequencing           | TGAGAGGAGAGAGGGA                                 |                   |
| SEZ6L       | Forward              | AGGTTGGGTAGGTAATGGA                              | 188               |
|             | Biotinylated reverse | GGGACACCGCTGATCGTTTAAACAAAATTTAACCCCAATTCCCCTTAC |                   |
|             | Sequencing           | GTTAGGTAGAGTTGTTGG                               |                   |
| ZIM2        | Forward              | TGAGGTTGTTGATTGGTTAGTATAG                        | 148               |
|             | Biotinylated reverse | GGGACACCGCTGATCGTTTACCAACCCAAAATAAACATCTC        |                   |
|             | Sequencing           | GAGAAGTTTTGATAAGG                                |                   |
| PI3         | Forward              | GTTATTGAGTTGAGGTGGAGTT                           | 174               |
|             | Biotinylated reverse | GGGACACCGCTGATCGTTTAAATAACCAAAAACCTCCACAATC      |                   |
|             | Sequencing           | ATTAAGTTTGAAATTGAGGG                             |                   |
| PGR         | Forward              | GGTAAAGAGAATTTGGGAAGTAGG                         | 124               |

|       |                      |                                                |     |
|-------|----------------------|------------------------------------------------|-----|
|       | Biotinylated reverse | GGGACACCGCTGATCGTTTAATACTTCTATACCCACACTTACTC   |     |
|       | Sequencing           | GGAAGTAGGTATAGAATGTTTA                         |     |
|       | Biotinylated forward | GGGACACCGCTGATCGTTTATTTTTAGTTTAGGATGGTTAAGATGT |     |
| INS   | Reverse              | CCCAAATCATACCTCCTTCT                           | 182 |
|       | Sequencing           | ACCTTAACCCATCCAT                               |     |
|       | Forward              | GGAGGGGTAGTGAGAGAAT                            |     |
| SFTP1 | Biotinylated reverse | GGGACACCGCTGATCGTTTACACTCACTAACTCACACCATCTATC  | 179 |
|       | Sequencing           | TATTTTGAGGGGGGT                                |     |
|       | Forward              | ATGGTTAGAGAGTGGTGATATT                         |     |
| CCL3  | Biotinylated reverse | GGGACACCGCTGATCGTTTACAATCCTTTCTTAACTCTACTAACAC | 174 |
|       | Sequencing           | GTAGGTGAAGGAATGTGG                             |     |
|       | Forward              | AGGAAGGTTGTTAGGGTTTTATTAGT                     |     |
| CSF3R | Biotinylated reverse | GGGACACCGCTGATCGTTTATACTTAACTCCTTAATCTCTTCT    | 240 |
|       | Sequencing           | TTGTTAGAGGTTGAGTTAT                            |     |
|       | Forward              | AGGGAGTTGAGGGTTAGTG                            |     |
| TRPM5 | Biotinylated reverse | GGGACACCGCTGATCGTTTACTCAACCTCATAAACTCATATCT    | 109 |
|       | Sequencing           | AGAGGGTTGAGATG                                 |     |
|       | Forward              | AGAAGGGTTTAGGAAATATAGGAAT                      |     |
| MAPK4 | Biotinylated reverse | GGGACACCGCTGATCGTTTAAAATCACTACCACCAACTCTCT     | 141 |
|       | Sequencing           | AGGAAATATAGGAATTAGTAG                          |     |
|       | Forward              | TGTATTAGGAGGGGAGAGGGAGTATTTA                   |     |
| PAX6  | Biotinylated reverse | GGGACACCGCTGATCGTTTATATCATCATCCTCCAACAAAACACT  | 206 |
|       | Sequencing           | GGAGAGGGAGTATTTAAT                             |     |

**Table S4.** List of primers used in RT-PCR

| Gene symbol | Primer type                | Sequence or TaqMan <sup>®</sup> Assay ID | Product size (bp) |
|-------------|----------------------------|------------------------------------------|-------------------|
| CD81        | Forward                    | GCCAAGGATGTGAAGCAGTT                     | 208               |
|             | Reverse                    | CCTCCTTGAAGAGGTTGCTG                     |                   |
| E2F5        | Forward                    | CTGGAGGTACCCATTCCAGA                     | 168               |
|             | Reverse                    | GGAAGGCTGTGTGAGGTCAT                     |                   |
| JAK3        | Forward                    | AGCCGCCTCCTTCTCTATTC                     | 212               |
|             | Reverse                    | TACCAGAAAATGGGGCTCTG                     |                   |
| CCL3        | TaqMan <sup>®</sup> probes | Hs00234142_m1                            | 53                |
| INS         | TaqMan <sup>®</sup> probes | Hs02741908_m1                            | 139               |
| MAPK4       | TaqMan <sup>®</sup> probes | Hs00177074_m1                            | 72                |
| PAX6        | TaqMan <sup>®</sup> probes | Hs00240871_m1                            | 76                |
| PGR         | TaqMan <sup>®</sup> probes | Hs01556702_m1                            | 77                |

**Table S5.** List of 44 top-ranked probes containing DNA methylated CpG sites.

| Rank | Probe ID | Gene ID | Gene symbol        | GRN <sub>escc</sub> | GRN <sub>g-escc</sub> | TSS    | Gene description                                                                                   | Methylation level<br>(Tumor/Normal) | GOs                                                                                                                                       |
|------|----------|---------|--------------------|---------------------|-----------------------|--------|----------------------------------------------------------------------------------------------------|-------------------------------------|-------------------------------------------------------------------------------------------------------------------------------------------|
| 1    | 5725     | 9353    | SLIT2 <sup>†</sup> | Yes                 | No                    | +111   | Slit homolog 2                                                                                     | I                                   | GO:0045595~regulation of cell differentiation<br>GO:0001525~angiogenesis<br>GO:0016477~cell migration<br>GO:0006935~chemotaxis            |
| 2    | 5615     | 3718    | JAK3*              | Yes                 | No                    | +64    | Janus kinase 3                                                                                     | I                                   | GO:0007166~cell surface receptor linked signal transduction                                                                               |
| 3    | 3926     | 6581    | SLC22A3            | No                  | Yes                   | +122   | Solute carrier family 22 (extraneuronal monoamine transporter), member 3                           | D                                   |                                                                                                                                           |
| 4    | 6139     | 1029    | CDKN2A             | Yes                 | No                    | Null   | Cyclin-dependent kinase inhibitor 2A                                                               | I                                   | GO:0045595~regulation of cell differentiation<br>GO:0001558~regulation of cell growth<br>GO:0042981~regulation of apoptosis               |
| 5    | 3913     | 6435    | SFTPA1*            | No                  | No                    | +340   | Surfactant, pulmonary-associated protein A1                                                        | D                                   |                                                                                                                                           |
| 6    | 2192     | 2273    | FHL1 <sup>†</sup>  | Yes                 | No                    | -768   | Four and a half LIM domains 1                                                                      | I                                   |                                                                                                                                           |
| 7    | 4002     | 2242    | FES                | Yes                 | No                    | -223   | V-FES feline sarcoma viral/V-FPS fujinami avian sarcoma viral oncogene homolog                     | I                                   | GO:0008283~cell proliferation                                                                                                             |
| 8    | 2003     | 160728  | SLC5A8*            | No                  | No                    | -38    | Solute carrier family 5 (iodide transporter), member 8                                             | I                                   |                                                                                                                                           |
| 9    | 1072     | 3202    | HOXA5              | Yes                 | No                    | -1,324 | Homeobox A5                                                                                        | I                                   |                                                                                                                                           |
| 10   | 3752     | 5179    | PENK*              | No                  | Yes                   | +26    | Proenkephalin                                                                                      | I                                   |                                                                                                                                           |
| 11   | 1661     | 5080    | PAX6*              | Yes                 | No                    | -1,121 | Paired box gene 6 isoform b                                                                        | I                                   | GO:0045595~regulation of cell differentiation<br>GO:0016477~cell migration                                                                |
| 12   | 2136     | 8577    | TMEFF1             | No                  | Yes                   | -626   | Transmembrane protein with EGF-like and two follistatin-like domains 1                             | I                                   |                                                                                                                                           |
| 13   | 1685     | 5266    | PI3*               | No                  | Yes                   | -1,394 | Elafin preproprotein                                                                               | D                                   |                                                                                                                                           |
| 14   | 4232     | 3791    | KDR                | Yes                 | No                    | -445   | Kinase insert domain receptor (a type III receptor tyrosine kinase)                                | I                                   | GO:0001525~angiogenesis<br>GO:0016477~cell migration                                                                                      |
| 15   | 2811     | 5241    | PGR*               | Yes                 | No                    | -456   | Progesterone receptor                                                                              | D                                   |                                                                                                                                           |
| 16   | 5968     | 7070    | THY1 <sup>†</sup>  | Yes                 | No                    | -20    | Thy-1 cell surface antigen                                                                         | I                                   | GO:0045595~regulation of cell differentiation<br>GO:0001525~angiogenesis<br>GO:0007155~cell adhesion                                      |
| 17   | 2868     | 6348    | CCL3*              | Yes                 | No                    | +53    | Chemokine (C-C motif) ligand 3                                                                     | D                                   | GO:0006935~chemotaxis                                                                                                                     |
| 18   | 2721     | 3569    | IL6                | Yes                 | No                    | -611   | Interleukin 6 (interferon, beta 2)                                                                 | D                                   | GO:0045595~regulation of cell differentiation<br>GO:0016477~cell migration<br>GO:0006935~chemotaxis<br>GO:0042981~regulation of apoptosis |
| 19   | 1203     | 3630    | INS*               | Yes                 | No                    | -804   | Proinsulin precursor                                                                               | D                                   | GO:0045595~regulation of cell differentiation<br>GO:0001558~regulation of cell growth<br>GO:0042981~regulation of apoptosis               |
| 20   | 247      | 1080    | CFTR*              | Yes                 | No                    | -115   | Cystic fibrosis transmembrane conductance regulator, ATP-binding cassette (sub-family C, member 7) | I                                   |                                                                                                                                           |
| 21   | 1087     | 9956    | HS3ST2*            | No                  | No                    | -546   | Heparan sulfate D-glucosaminyl 3-O-sulfotransferase 2                                              | I                                   |                                                                                                                                           |
| 22   | 3534     | 50801   | KCNK4*             | No                  | No                    | +3     | Potassium channel, subfamily K,                                                                    | I                                   |                                                                                                                                           |

| member 4 isoform 1 |      |        |           |     |     |        |                                                                                                                  |   |                                                                                                                                           |
|--------------------|------|--------|-----------|-----|-----|--------|------------------------------------------------------------------------------------------------------------------|---|-------------------------------------------------------------------------------------------------------------------------------------------|
| 23                 | 5893 | 3651   | IPF1      | Yes | No  | -750   | Insulin promoter factor 1, homeodomain transcription factor                                                      | I |                                                                                                                                           |
| 24                 | 3981 | 8794   | TNFRSF10C | No  | Yes | +109   | Tumor necrosis factor receptor superfamily, member 10c precursor                                                 | I |                                                                                                                                           |
| 25                 | 631  | 3205   | HOXA9     | No  | Yes | +252   | Homeobox protein A9 isoform b                                                                                    | I |                                                                                                                                           |
| 26                 | 6131 | 23671  | TMEFF2    | No  | Yes | +442   | Transmembrane protein with EGF-like and two follistatin-like domains 2                                           | I |                                                                                                                                           |
| 27                 | 5078 | 4811   | NID1      | Yes | No  | -714   | Nidogen (enactin)                                                                                                | D | GO:0007155~cell adhesion                                                                                                                  |
| 28                 | 5943 | 64321  | SOX17     | No  | Yes | -303   | SRY-box 17                                                                                                       | I | GO:0001525~angiogenesis                                                                                                                   |
| 29                 | 2153 | 29850  | TRPM5*    | No  | No  | -721   | Transient receptor potential cation channel, subfamily M, member 5                                               | D |                                                                                                                                           |
| 30                 | 1088 | 9956   | HS3ST2    | No  | Yes | -171   | Heparan sulfate D-glucosaminyl 3-O-sulfotransferase 2                                                            | I |                                                                                                                                           |
| 31                 | 5660 | 5596   | MAPK4*†   | Yes | No  | 273    | Mitogen-activated protein kinase 4                                                                               | D |                                                                                                                                           |
| 32                 | 758  | 2070   | EYA4      | No  | Yes | -508   | Eyes absent 4 isoform a                                                                                          | I |                                                                                                                                           |
| 33                 | 5602 | 1875   | E2F5*     | Yes | No  | -516   | E2F transcription factor 5                                                                                       | I |                                                                                                                                           |
| 34                 | 1790 | 63968  | PWCR1     | No  | No  | -811   | Prader-Willi syndrome chromosome region 1                                                                        | D |                                                                                                                                           |
| 35                 | 5345 | 7077   | TIMP2†    | Yes | No  | -267   | Similar to Metalloproteinase inhibitor 2 precursor (TIMP-2) (Tissue inhibitor of metalloproteinases-2) (CSC-21K) | I | GO:0045595~regulation of cell differentiation                                                                                             |
| 36                 | 950  | 283120 | H19       | No  | No  | -1,411 | H19, imprinted maternally expressed transcript (non-protein coding)                                              | D |                                                                                                                                           |
| 37                 | 220  | 975    | CD81*     | Yes | No  | -272   | CD81 antigen                                                                                                     | I | GO:0008283~cell proliferation<br>GO:0044409~entry into host<br>GO:0030260~entry into host cell                                            |
| 38                 | 3463 | 1441   | CSF3R*    | Yes | No  | -8     | Colony stimulating factor 3 receptor isoform d precursor                                                         | D | GO:0007155~cell adhesion                                                                                                                  |
| 39                 | 1262 | 50801  | KCNK4*    | No  | No  | -171   | Potassium channel, subfamily K, member 4 isoform 1                                                               | I |                                                                                                                                           |
| 40                 | 1931 | 23544  | SEZ6L*    | No  | No  | -299   | Seizure related 6 homolog (mouse)-like precursor                                                                 | I |                                                                                                                                           |
| 41                 | 961  | 338433 | HBII-52   | No  | No  | -563   | Small nucleolar RNA, C/D box 115-1                                                                               | D |                                                                                                                                           |
| 42                 | 4118 | 3569   | IL6       | Yes | No  | +168   | Interleukin 6 (interferon, beta 2)                                                                               | D | GO:0045595~regulation of cell differentiation<br>GO:0016477~cell migration<br>GO:0006935~chemotaxis<br>GO:0042981~regulation of apoptosis |
| 43                 | 2198 | 23619  | ZIM2*     | No  | No  | -22    | Zinc finger, imprinted 2                                                                                         | I |                                                                                                                                           |
| 44                 | 41   | 116    | ADCYAP1*  | No  | Yes | -455   | Adenylate cyclase activating polypeptide precursor                                                               | I |                                                                                                                                           |

Rank: ranked genes in ascending order based on logrank-test-derived p-values; TSS: methylated CpG sites relative to transcription start site; \*: available for primer design for pyrosequencing validation; †: overlapped with literature-curated significantly expressed genes associated with ESCC progression; GRN<sub>esc</sub>: ESCC progression-associated gene regulatory network; GRN<sub>g-esc</sub>: non-ESCC progression-associated gene regulatory network; I: methylation level increased in tumor; D: methylation level decreased in tumor; Yes: in network; No: not in network; GOs: cancer progression-related Gene Ontology terms.



**Table S6.** Univariate and multivariate analysis of 20 validated CpG sites with clinico-pathological prognostic factors in the validation cohort.

| Univariate                                            |                         |         |
|-------------------------------------------------------|-------------------------|---------|
|                                                       | HR (95% CI)             | P-value |
| Gene methylation (increased vs decreased methylation) |                         |         |
| In-CpGs                                               |                         |         |
| <i>JAK3</i>                                           | 2.61 (0.93-7.30)        | 0.068   |
| <i>PAX6</i>                                           | 4.33 (0.93-20.11)       | 0.062   |
| <i>CFTR</i>                                           | 0.48 (0.16-1.46)        | 0.198   |
| <i>E2F5</i>                                           | 3.08 (1.10-8.63)        | 0.032*  |
| <i>CD81</i>                                           | 2.95 (1.17-7.41)        | 0.021*  |
| <i>CCL3</i>                                           | 8.46 (1.12-63.74)       | 0.038*  |
| <i>CSF3R</i>                                          | 24.53 (0.03-23196.12)   | 0.360   |
| <i>INS</i>                                            | 0.32 (0.103-0.101)      | 0.052   |
| <i>MAPK4</i>                                          | 0.06 (0.01-0.67)        | 0.022*  |
| <i>PGR</i>                                            | 3.70 (1.30-10.46)       | 0.014*  |
| Out-CpGs                                              |                         |         |
| <i>SLC5A8</i>                                         | 3.16 (0.60-16.67)       | 0.176   |
| <i>PENK</i>                                           | 0.48 (0.18-1.28)        | 0.143   |
| <i>HS3ST2</i>                                         | 0.71 (0.26-1.97)        | 0.509   |
| <i>KCNK4</i>                                          | 28.15 (0.06-13818.94)   | 0.291   |
| <i>SEZ6L</i>                                          | 1.69 (0.68-4.15)        | 0.257   |
| <i>ZIM2</i>                                           | 0.04 (0.00-74.11)       | 0.409   |
| <i>ADCYAP1</i>                                        | 1.42 (0.66-3.08)        | 0.373   |
| <i>PI3</i>                                            | 2.06 (0.59-7.11)        | 0.255   |
| <i>SFTPA1</i>                                         | 21.34 (0.00-1031990.42) | 0.578   |
| <i>TRPM5</i>                                          | 1.81 (0.68-4.83)        | 0.239   |
| TNM stage (III/IV vs I/II)                            | 0.97 (0.35-2.74)        | 0.957   |
| Local lymph node metastasis (yes vs no)               | 0.53 (0.21-1.35)        | 0.181   |
| Distant metastasis (yes vs no)                        | 2.81 (1.08-7.34)        | 0.035*  |
| Age ( $\geq 55$ vs $< 55$ )                           | 0.40 (0.14-1.14)        | 0.086   |
| Drinking status (yes vs no)                           | 1.13 (0.26-4.90)        | 0.876   |
| Multivariate <sup>c</sup>                             |                         |         |
| <i>JAK3</i>                                           | 2.70 (0.96-7.59)        | 0.060   |
| <i>PAX6</i>                                           | 3.90 (0.81-18.78)       | 0.089   |
| <i>E2F5</i>                                           | 3.18 (1.13-8.92)        | 0.028*  |
| <i>CD81</i>                                           | 3.52 (1.35-9.18)        | 0.010*  |
| <i>CCL3</i>                                           | 7.67 (1.01-58.12)       | 0.049*  |
| <i>INS</i>                                            | 0.24 (0.07-0.78)        | 0.018*  |
| <i>MAPK4</i>                                          | 0.11 (0.01-1.29)        | 0.079   |
| <i>PGR</i>                                            | 5.26 (1.73-16.04)       | 0.004*  |

HR: hazard ratio; CI: confidence interval; c: multivariate analysis in each gene was adjusted with distant metastasis; \*: p-value < 0.05.

**Table S7.** Array-based examination of methylated In-CpG and Out-CpG sites.

| CpGs    | Distance from TSS | Gene    | Fold change (p-value <sup>1</sup> ) | Association with survival p-value <sup>2</sup> | Survival correlation direction <sup>3</sup> |
|---------|-------------------|---------|-------------------------------------|------------------------------------------------|---------------------------------------------|
| In-CpG  | +64               | JAK3    | 1.2 (<0.0004**)                     | <0.0001***                                     | –                                           |
| In-CpG  | -1,121            | PAX6    | 1.2 (<0.0001***)                    | 0.017*                                         | –                                           |
| In-CpG  | -115              | CFTR    | 1.1 (0.047*)                        | 0.0002**                                       | –                                           |
| In-CpG  | -516              | E2F5    | 1.1 (<0.0001***)                    | <0.0001***                                     | –                                           |
| In-CpG  | -272              | CD81    | 1.1 (0.001*)                        | <0.0001***                                     | –                                           |
| In-CpG  | +53               | CCL3    | -1.1 (<0.0001***)                   | 0.017*                                         | +                                           |
| In-CpG  | -8                | CSF3R   | -1.2 (<0.0001***)                   | 0.002*                                         | +                                           |
| In-CpG  | -804              | INS     | -1.1 (<0.0001***)                   | 0.023*                                         | –                                           |
| In-CpG  | +273              | MAPK4   | -1.1 (<0.0001***)                   | 0.047*                                         | –                                           |
| In-CpG  | -456              | PGR     | -1.1 (<0.0001***)                   | 0.011*                                         | +                                           |
| Out-CpG | -38               | SLC5A8  | 1.1 (0.006*)                        | 0.0005**                                       | –                                           |
| Out-CpG | +26               | PENK    | 1.5 (<0.0001***)                    | 0.004*                                         | +                                           |
| Out-CpG | -546              | HS3ST2  | 1.1 (<0.0003**)                     | 0.130                                          | –                                           |
| Out-CpG | +3                | KCNK4   | 1.2 (<0.0001***)                    | 0.038*                                         | –                                           |
| Out-CpG | -299              | SEZ6L   | 1.1 (0.0009**)                      | 0.113                                          | –                                           |
| Out-CpG | -22               | ZIM2    | 1.1 (<0.0001***)                    | 0.075                                          | –                                           |
| Out-CpG | -455              | ADCYAP1 | 1.3 (<0.0001***)                    | 0.0002**                                       | –                                           |
| Out-CpG | -1,394            | PI3     | -1.2 (<0.0001***)                   | 0.004*                                         | +                                           |
| Out-CpG | +340              | SFTPA1  | -1.1 (<0.0001***)                   | 0.003*                                         | –                                           |
| Out-CpG | -721              | TRPM5   | -1.1 (0.0003**)                     | 0.075                                          | –                                           |

TSS: transcription start site; Fold change: beta values between matched ESCC and normal adjacent tissue; 1: p-value of t-test; 2: p-value of log-rank test; 3: the direction of correlation was considered as “+” (respectively “–”) when the methylation increase in tumor led to a good (respectively poor) survival rate; NA: not applicable; \*: p-value < 0.05; \*\*: p-value < 0.001; \*\*\*: p-value < 0.0001.

**Method S1.** Detailed procedures to calculate the 6 correlation metrics.

The support  $Supp$  is a widely-used measure in *association rule* data mining (Liu, et al., 2011). In this study, for each probe, a  $Supp$  of sample set  $X$  is defined as the proportion of total clinical samples in the data set which contains  $X$ . The exact definition is given by the following equation.

$$Supp(X) = \frac{C_x}{\# \text{ of samples}}, X \subset \{hypo, hyper, N_0, N_1\}$$

Where  $C_x$  represents the occurrence times of  $X$  for a given probe.

$$PhiCoefficient(hypo, N_0) = \frac{Supp(hypo, N_0) - Supp(hypo)Supp(N_0)}{\sqrt{Supp(hypo)Supp(N_0)(1 - Supp(hypo))(1 - Supp(N_0))}}$$

The domain of  $PhiCoefficient$  (Cramer, 1946) is given by  $[-1, 1]$ , and a value of 0 implies that there is no correlation.

$$OddsRatio(hypo, N_0, hyper, N_1) = \frac{\frac{Supp(hypo, N_0)}{Supp(hyper, N_0)}}{\frac{Supp(hypo, N_1)}{Supp(hyper, N_1)}} = \frac{Supp(hypo, N_0)Supp(hyper, N_1)}{Supp(hyper, N_0)Supp(hypo, N_1)}$$

The domain of  $OddsRatio$  (Edwards, 1963) is given by  $[0, \infty]$ , and a value of 1 implies that there is no correlation.

$$PiatetskyShapiroMeasure(hypo, N_0) = Supp(hypo, N_0) - Supp(hypo)Supp(N_0)$$

The domain of  $PiatetskyShapiroMeasure$  (Piatetsky-Shapiro, 1991) is given by  $[-0.25, 0.25]$ , and a value of 0 implies that there is no correlation.

$$LiftMeasure(hypo, N_0) = \frac{Supp(hypo, N_0)}{Supp(hypo)Supp(N_0)}$$

The domain of  $LiftMeasure$  (Tufféry, 2011) is given by  $[0, \infty]$ , and a value of 1 implies that there is no correlation.

$$AddedValue(hypo, N_0) = \frac{Supp(hypo, N_0)}{Supp(hypo)} - Supp(N_0)$$

The domain of  $AddedValue$  (Sahar and Mansour, 1999) is given by  $[-0.5, 1]$ , and a value of 0 implies that there is no correlation.

$$KlosgenMeasure(hypo, N_0) = \sqrt{Supp(hypo, N_0)} \times AddedValue(hypo, N_0)$$

The domain of  $KlosgenMeasure$  (Klösigen, 1992) is given by  $[(2/\sqrt{3}-1)^{1/2}(2-\sqrt{3}-1/\sqrt{3}), 2/3\sqrt{3}]$ , and a value of 0 implies that there is no correlation.

## References

- Akagi, I., *et al.* (2009) Overexpression of PIK3CA is associated with lymph node metastasis in esophageal squamous cell carcinoma, *International journal of oncology*, **34**, 767-775.
- Cao, W.F., *et al.* (2010) [Expression of SLP-2 protein in esophageal squamous cell carcinoma is associated with cancer invasion], *Zhonghua zhong liu za zhi [Chinese journal of oncology]*, **32**, 830-833.
- Chen, Y.K., *et al.* (2010) Molecular characterization of invasive subpopulations from an esophageal squamous cell carcinoma cell line, *Anticancer research*, **30**, 727-736.
- Chen, Z.L., *et al.* (2011) microRNA-92a promotes lymph node metastasis of human esophageal squamous cell carcinoma via E-cadherin, *The Journal of biological chemistry*, **286**, 10725-10734.
- Chiba, T., *et al.* (2010) Independent histological risk factors for lymph node metastasis of superficial esophageal squamous cell carcinoma; implication of claudin-5 immunohistochemistry for expanding the indications of endoscopic resection, *Diseases of the esophagus : official journal of the International Society for Diseases of the Esophagus / I.S.D.E*, **23**, 398-407.
- Chuang, W.Y., *et al.* (2009) Tumor cell expression of podoplanin correlates with nodal metastasis in esophageal squamous cell carcinoma, *Histology and histopathology*, **24**, 1021-1027.
- Cramer, H. (1946) *Mathematical Methods of Statistics*. Princeton University Press, Princeton, NJ.
- Ding, Y., *et al.* (2003) Association of CC chemokine receptor 7 with lymph node metastasis of esophageal squamous cell carcinoma, *Clinical cancer research : an official journal of the American Association for Cancer Research*, **9**, 3406-3412.
- Edwards, A.W.F. (1963) The Measure of Association in a  $2 \times 2$  Table, *Journal of the Royal Statistical Society*, **126**, 109-114.
- Grugan, K.D., *et al.* (2010) Fibroblast-secreted hepatocyte growth factor plays a functional role in esophageal squamous cell carcinoma invasion, *Proceedings of the National Academy of Sciences of the United States of America*, **107**, 11026-11031.
- Han, U., *et al.* (2007) Expressions of p53, VEGF C, p21: could they be used in preoperative evaluation of lymph node metastasis of esophageal squamous cell carcinoma?, *Diseases of the esophagus : official journal of the International Society for Diseases of the Esophagus / I.S.D.E*, **20**, 379-385.
- Hansen, L.V., *et al.* (2008) Altered expression of the urokinase receptor homologue, C4.4A, in invasive areas of human esophageal squamous cell carcinoma, *International journal of cancer. Journal international du cancer*, **122**, 734-741.
- Hou, J., *et al.* (2011) Cytoplasmic HDPR1 is involved in regional lymph node metastasis and tumor development via beta-catenin accumulation in esophageal squamous cell carcinoma, *The journal of histochemistry and cytochemistry : official journal of the Histochemistry Society*, **59**, 711-718.
- Ishida, K., *et al.* (2009) High CCR7 mRNA expression of cancer cells is associated with lymph node involvement in patients with esophageal squamous cell carcinoma, *International journal of oncology*, **34**, 915-922.
- Ito, T., *et al.* (2008) Pituitary tumor-transforming 1 increases cell motility and promotes lymph node metastasis in esophageal squamous cell carcinoma, *Cancer research*, **68**, 3214-3224.
- Jiao, W.J., *et al.* (2007) Effect of endothelin-1 in esophageal squamous cell carcinoma invasion and its correlation with cathepsin B, *World journal of gastroenterology : WJG*, **13**, 4002-4005.

- Jin, H., *et al.* (2010) Vimentin expression of esophageal squamous cell carcinoma and its aggressive potential for lymph node metastasis, *Biomed Res*, **31**, 105-112.
- Kaihara, T., *et al.* (2001) Decreased expression of E-cadherin and Yamamoto-Kohama's mode of invasion highly correlates with lymph node metastasis in esophageal squamous cell carcinoma, *Pathobiology : journal of immunopathology, molecular and cellular biology*, **69**, 172-178.
- Kato, K., *et al.* (2002) Overexpression of caveolin-1 in esophageal squamous cell carcinoma correlates with lymph node metastasis and pathologic stage, *Cancer*, **94**, 929-933.
- Kawamura, T., *et al.* (1996) Acceleration of proliferative activity of esophageal squamous cell carcinoma with invasion beyond the mucosa: immunohistochemical analysis of Ki-67 and p53 antigen in relation to histopathologic findings, *Cancer*, **77**, 843-849.
- Kim, H.K., *et al.* (2008) Slit2 inhibits growth and metastasis of fibrosarcoma and squamous cell carcinoma, *Neoplasia*, **10**, 1411-1420.
- Kita, Y., *et al.* (2011) STC2: a predictive marker for lymph node metastasis in esophageal squamous-cell carcinoma, *Annals of surgical oncology*, **18**, 261-272.
- Klösgen, W. (1992) Problems for knowledge discovery in databases and their treatment in the statistics interpreter explora, *International Journal of Intelligent Systems*, **7**, 649-673.
- Kong, K.L., *et al.* (2012) MicroRNA-375 inhibits tumour growth and metastasis in oesophageal squamous cell carcinoma through repressing insulin-like growth factor 1 receptor, *Gut*, **61**, 33-42.
- Krzystek-Korpacka, M., *et al.* (2007) Up-regulation of VEGF-C secreted by cancer cells and not VEGF-A correlates with clinical evaluation of lymph node metastasis in esophageal squamous cell carcinoma (ESCC), *Cancer letters*, **249**, 171-177.
- Kurokawa, T., *et al.* (2003) Overexpression of hypoxia-inducible-factor 1alpha(HIF-1alpha) in oesophageal squamous cell carcinoma correlates with lymph node metastasis and pathologic stage, *British journal of cancer*, **89**, 1042-1047.
- Li, K., *et al.* (2009) N-cadherin knock-down decreases invasiveness of esophageal squamous cell carcinoma in vitro, *World journal of gastroenterology : WJG*, **15**, 697-704.
- Li, K., *et al.* (2010) Downregulation of N-cadherin expression inhibits invasiveness, arrests cell cycle and induces cell apoptosis in esophageal squamous cell carcinoma, *Cancer investigation*, **28**, 479-486.
- Li, K., *et al.* (2009) Expression of N-cadherin in esophageal squamous cell carcinoma and silencing expression of N-cadherin using RNA interference on invasiveness of EC9706 cells, *Ai zheng = Aizheng = Chinese journal of cancer*, **28**, 8-13.
- Li, L., *et al.* (2006) DRD2/DARPP-32 expression correlates with lymph node metastasis and tumor progression in patients with esophageal squamous cell carcinoma, *World journal of surgery*, **30**, 1672-1679; discussion 1680-1671.
- Li, N., *et al.* (2009) [Effect of KISS-1 on invasive potential and proliferation of esophageal squamous carcinoma cell line EC-1], *Zhonghua bing li xue za zhi Chinese journal of pathology*, **38**, 263-267.
- Li, P., *et al.* (2006) Expression profile of metastasis-associated genes in esophageal squamous cell carcinoma, *Journal of Huazhong University of Science and Technology. Medical sciences = Hua zhong ke ji da xue xue bao. Yi xue Ying De wen ban = Huazhong keji daxue xuebao. Yixue Yingdewen ban*, **26**, 167-171.
- Li, W., *et al.* (2005) Overexpression of stefin A in human esophageal squamous cell carcinoma cells inhibits

- tumor cell growth, angiogenesis, invasion, and metastasis, *Clinical cancer research : an official journal of the American Association for Cancer Research*, **11**, 8753-8762.
- Lioni, M., *et al.* (2007) Dysregulation of claudin-7 leads to loss of E-cadherin expression and the increased invasion of esophageal squamous cell carcinoma cells, *The American journal of pathology*, **170**, 709-721.
- Liu, S.G., *et al.* (2011) Atypical protein kinase Ciota (PKCiota) promotes metastasis of esophageal squamous cell carcinoma by enhancing resistance to Anoikis via PKCiota-SKP2-AKT pathway, *Molecular cancer research : MCR*, **9**, 390-402.
- Liu, Y.C., Cheng, C.P. and Tseng, V.S. (2011) Discovering relational-based association rules with multiple minimum supports on microarray datasets, *Bioinformatics*, **27**, 3142-3148.
- Luo, M.L., *et al.* (2006) Amplification and overexpression of CTTN (EMS1) contribute to the metastasis of esophageal squamous cell carcinoma by promoting cell migration and anoikis resistance, *Cancer research*, **66**, 11690-11699.
- Luo, M.L. and Wang, M.R. (2007) CTTN (EMS1): an oncogene contributing to the metastasis of esophageal squamous cell carcinoma, *Cell research*, **17**, 298-300.
- Matsushima, K., *et al.* (2011) MiRNA-205 modulates cellular invasion and migration via regulating zinc finger E-box binding homeobox 2 expression in esophageal squamous cell carcinoma cells, *Journal of translational medicine*, **9**, 30.
- Matsushita, Y., *et al.* (1998) A subcloned human esophageal squamous cell carcinoma cell line with low thrombomodulin expression showed increased invasiveness compared with a high thrombomodulin-expressing clone--thrombomodulin as a possible candidate for an adhesion molecule of squamous cell carcinoma, *Cancer letters*, **127**, 195-201.
- Michaylira, C.Z., *et al.* (2010) Periostin, a cell adhesion molecule, facilitates invasion in the tumor microenvironment and annotates a novel tumor-invasive signature in esophageal cancer, *Cancer research*, **70**, 5281-5292.
- Miyazaki, T., *et al.* (2003) FAK overexpression is correlated with tumour invasiveness and lymph node metastasis in oesophageal squamous cell carcinoma, *British journal of cancer*, **89**, 140-145.
- Miyazaki, T., *et al.* (2000) Mutation and expression of the metastasis suppressor gene KAI1 in esophageal squamous cell carcinoma, *Cancer*, **89**, 955-962.
- Mori, Y., *et al.* (2006) Gli-1 expression is associated with lymph node metastasis and tumor progression in esophageal squamous cell carcinoma, *Oncology*, **70**, 378-389.
- Mukherjee, T., *et al.* (2003) Ets-1 and VEGF expression correlates with tumor angiogenesis, lymph node metastasis, and patient survival in esophageal squamous cell carcinoma, *Journal of cancer research and clinical oncology*, **129**, 430-436.
- Nagatani, S., *et al.* (2003) Validation of intra-operative detection of paratracheal lymph node metastasis using real-time RT-PCR targeting esophageal squamous cell carcinoma, *Japanese journal of clinical oncology*, **33**, 549-555.
- Nakajima, Y., *et al.* (2002) Evaluation of an indicator for lymph node metastasis of esophageal squamous cell carcinoma invading the submucosal layer, *Japanese journal of cancer research : Gann*, **93**, 305-312.
- Oda, N. and Ono, Y. (2004) [Significance of the Yamamoto-Kohama mode of invasion in the prognosis of esophageal squamous cell carcinoma: relationship with reduced expression of involucrin protein], *Nihon*

- Shokakibyō Gakkai zasshi = The Japanese journal of gastro-enterology*, **101**, 591-597.
- Ooki, A., *et al.* (2010) Phosphatase of regenerating liver-3 as a convergent therapeutic target for lymph node metastasis in esophageal squamous cell carcinoma, *International journal of cancer. Journal international du cancer*, **127**, 543-554.
- Piatetsky-Shapiro, G. (1991) *Discovery, analysis, and presentation of strong rules*. Knowledge Discovery in Databases. AAAI/MIT Press, Cambridge, MA.
- Qian, H., *et al.* (2005) Reduced MTA1 expression by RNAi inhibits in vitro invasion and migration of esophageal squamous cell carcinoma cell line, *Clinical & experimental metastasis*, **22**, 653-662.
- Ren, Y., *et al.* (2005) Macrophage migration inhibitory factor stimulates angiogenic factor expression and correlates with differentiation and lymph node status in patients with esophageal squamous cell carcinoma, *Annals of surgery*, **242**, 55-63.
- Sadanaga, N., *et al.* (1994) Local immune response to tumor invasion in esophageal squamous cell carcinoma. The expression of human leukocyte antigen-DR and lymphocyte infiltration, *Cancer*, **74**, 586-591.
- Sahar, S. and Mansour, Y. (1999) An Empirical Evaluation of Interest-Level Criteria. In Dasarathy, B.V. (ed), *Data Mining and Knowledge Discovery: Theory, Tools, and Technology*.
- Sakai, M., *et al.* (2009) Expression of lysyl oxidase is correlated with lymph node metastasis and poor prognosis in esophageal squamous cell carcinoma, *Annals of surgical oncology*, **16**, 2494-2501.
- Shen, X.M., *et al.* (2007) Interaction of MT1-MMP and laminin-5gamma2 chain correlates with metastasis and invasiveness in human esophageal squamous cell carcinoma, *Clinical & experimental metastasis*, **24**, 541-550.
- Shi, J., *et al.* (2010) [Clinical significance of abnormal expression of Aurora-A in human esophageal squamous cell carcinoma with or without lymph node metastasis], *Zhonghua zhong liu za zhi [Chinese journal of oncology]*, **32**, 748-751.
- Shibata, T., *et al.* (2005) Impact of nuclear galectin-3 expression on histological differentiation and vascular invasion in patients with esophageal squamous cell carcinoma, *Oncology reports*, **13**, 235-239.
- Song, Y., *et al.* (2008) Overexpression of cyclin B1 in human esophageal squamous cell carcinoma cells induces tumor cell invasive growth and metastasis, *Carcinogenesis*, **29**, 307-315.
- Suzuki, S., *et al.* (2011) Prognostic significance of CD151 expression in esophageal squamous cell carcinoma with aggressive cell proliferation and invasiveness, *Annals of surgical oncology*, **18**, 888-893.
- Tang, P., *et al.* (2011) Slug down-regulation by RNA interference inhibits invasion growth in human esophageal squamous cell carcinoma, *BMC gastroenterology*, **11**, 60.
- Tezuka, Y., *et al.* (1995) Expression of thrombomodulin in esophageal squamous cell carcinoma and its relationship to lymph node metastasis, *Cancer research*, **55**, 4196-4200.
- Tomita, M., *et al.* (2001) Expression of nm23-H1 gene product in esophageal squamous cell carcinoma and its association with vessel invasion and survival, *BMC cancer*, **1**, 3.
- Tufféry, S. (2011) *Data Mining and Statistics for Decision Making*. translated from the French *Data Mining et statistique décisionnelle*. John Wiley & Sons, Chichester, GB.
- Uchida, S., *et al.* (1999) Motility-related protein (MRP-1/CD9) and KAI1/CD82 expression inversely correlate with lymph node metastasis in oesophageal squamous cell carcinoma, *British journal of cancer*,

79, 1168-1173.

- Uchikado, Y., *et al.* (2006) Gene expression profiling of lymph node metastasis by oligomicroarray analysis using laser microdissection in esophageal squamous cell carcinoma, *International journal of oncology*, **29**, 1337-1347.
- Usami, Y., *et al.* (2006) Reduced expression of claudin-7 correlates with invasion and metastasis in squamous cell carcinoma of the esophagus, *Human pathology*, **37**, 569-577.
- Verma, A., *et al.* (2005) MEMD/ALCAM: a potential marker for tumor invasion and nodal metastasis in esophageal squamous cell carcinoma, *Oncology*, **68**, 462-470.
- Wang, X., *et al.* (2009) Stable knockdown of Aurora-A by vector-based RNA interference in human esophageal squamous cell carcinoma cell line inhibits tumor cell proliferation, invasion and enhances apoptosis, *Cancer biology & therapy*, **8**, 1852-1859.
- Wang, X.C., *et al.* (2009) Suppression of anoikis by SKP2 amplification and overexpression promotes metastasis of esophageal squamous cell carcinoma, *Molecular cancer research : MCR*, **7**, 12-22.
- Wong, F.H., *et al.* (2009) Combination of microarray profiling and protein-protein interaction databases delineates the minimal discriminators as a metastasis network for esophageal squamous cell carcinoma, *International journal of oncology*, **34**, 117-128.
- Wong, V.C., *et al.* (2008) Identification of an invasion and tumor-suppressing gene, Endoglin (ENG), silenced by both epigenetic inactivation and allelic loss in esophageal squamous cell carcinoma, *International journal of cancer. Journal international du cancer*, **123**, 2816-2823.
- Wong, V.C., *et al.* (2011) Abrogated expression of DEC1 during oesophageal squamous cell carcinoma progression is age- and family history-related and significantly associated with lymph node metastasis, *British journal of cancer*, **104**, 841-849.
- Xie, F., Li, K. and Ouyang, X. (2009) Twist, an independent prognostic marker for predicting distant metastasis and survival rates of esophageal squamous cell carcinoma patients, *Clinical & experimental metastasis*, **26**, 1025-1032.
- Xie, F., *et al.* (2011) The impact of Metastasis Suppressor-1, MTSS1, on oesophageal squamous cell carcinoma and its clinical significance, *Journal of translational medicine*, **9**, 95.
- Xie, J.J., *et al.* (2011) Involvement of Cyr61 in the growth, invasiveness and adhesion of esophageal squamous cell carcinoma cells, *International journal of molecular medicine*, **27**, 429-434.
- Xiong, G., *et al.* (2011) Decoy receptor 3 expression in esophageal squamous cell carcinoma: correlation with tumour invasion and metastasis, *Biomarkers : biochemical indicators of exposure, response, and susceptibility to chemicals*, **16**, 155-160.
- Yamamoto, H., *et al.* (2001) Expression of the gamma(2) chain of laminin-5 at the invasive front is associated with recurrence and poor prognosis in human esophageal squamous cell carcinoma, *Clinical cancer research : an official journal of the American Association for Cancer Research*, **7**, 896-900.
- Yan, S., *et al.* (2009) PTTG overexpression promotes lymph node metastasis in human esophageal squamous cell carcinoma, *Cancer research*, **69**, 3283-3290.
- Yang, Y.L., *et al.* (2008) Amplification of PRKCI, located in 3q26, is associated with lymph node metastasis in esophageal squamous cell carcinoma, *Genes, chromosomes & cancer*, **47**, 127-136.
- Ye, Q., *et al.* (2011) MUC1 induces metastasis in esophageal squamous cell carcinoma by upregulating



- matrix metalloproteinase 13, *Laboratory investigation; a journal of technical methods and pathology*, **91**, 778-787.
- Yuen, H.F., *et al.* (2007) Id-1 and Id-2 are markers for metastasis and prognosis in oesophageal squamous cell carcinoma, *British journal of cancer*, **97**, 1409-1415.
- Yuen, H.F., *et al.* (2007) Upregulation of Twist in oesophageal squamous cell carcinoma is associated with neoplastic transformation and distant metastasis, *Journal of clinical pathology*, **60**, 510-514.
- Zhang, C., *et al.* (2007) p300 expression repression by hypermethylation associated with tumour invasion and metastasis in oesophageal squamous cell carcinoma, *Journal of clinical pathology*, **60**, 1249-1253.
- Zhang, H.Y., *et al.* (2012) S100A4 mediated cell invasion and metastasis of esophageal squamous cell carcinoma via the regulation of MMP-2 and E-cadherin activity, *Molecular biology reports*, **39**, 199-208.
- Zhang, H.Y., *et al.* (2010) [Expression of S100A4 in esophageal squamous cell carcinoma and its relation to tumor invasion and metastasis], *Nan fang yi ke da xue xue bao = Journal of Southern Medical University*, **30**, 1541-1544.
- Zhou, Z.Q., *et al.* (2009) Expression and prognostic significance of THBS1, Cyr61 and CTGF in esophageal squamous cell carcinoma, *BMC cancer*, **9**, 291.
